# Supplementary material for: Detection of Coccidioides posadasii from xerophytic environments in Venezuela reveals risk of naturally acquired coccidioidomycosis infections
Source: PubMed Central journal article supplement (PMC5874253; doi:10.1038/s41426-018-0049-6), 2018-03-29
Supplement: 41426_2018_49_MOESM1_ESM.pdf [file 41426_2018_49_MOESM1_ESM.pdf]

Table S1. Accession number, isolate and species identification, country and source of isolation for each taxa analyzed in the ITS2 phylogenetic tree in comparison with the soil OUT's identified in Venezuela.

| <b>Genbank Accession number</b> | <b>Isolate</b>  | <b>Species</b>    | <b>Country</b> | <b>Location</b>          | <b>Source</b> |
|---------------------------------|-----------------|-------------------|----------------|--------------------------|---------------|
| KF539889                        | M4890           | <i>C. immitis</i> | USA            | Santa Barbara County     | Human         |
| KF539888                        | SL-2            | <i>C. immitis</i> | USA            | Monterey County Coast    | Sea Lion      |
| KF539885                        | SL-2 (clone)    | <i>C. immitis</i> | USA            | Monterey County Coast    | Sea Lion      |
| KJ783449                        | 5447-09SP       | <i>C. immitis</i> | USA            | California               | Sea Otter     |
| KF539887                        | SL-2 (clone)    | <i>C. immitis</i> | USA            | Monterey County Coast    | Sea Lion      |
| KJ783448                        | 5447-09LU       | <i>C. immitis</i> | USA            | California               | Sea Otter     |
| AB232897                        | IFM 50995       | <i>C. immitis</i> | Japan          | Osaka                    | Human         |
| EF186788                        | CBS 113852      | <i>C. immitis</i> | Mexico         | North Mexico, Coahuila   | Human         |
| KJ783447                        | 5359-08LN       | <i>C. immitis</i> | USA            | California               | Sea Otter     |
| KF539868                        | K-692           | <i>C. immitis</i> | USA            | Kern County, CA          | Human         |
| AB232893                        | IFM 46868       | <i>C. immitis</i> | Japan          | Kanagawa, Yokohama       | Human         |
| KF539884                        | Soil 3A         | <i>C. immitis</i> | USA            | San Benedito County, CA  | Soil          |
| KF539900                        | AD-92           | <i>C. immitis</i> | USA            | N.I.                     | Human         |
| KF539871                        | K-692 (clone)   | <i>C. immitis</i> | USA            | Kern County, CA          | Human         |
| KF700276                        | CM7056          | <i>C. immitis</i> | USA            | California               | Human         |
| HG380500                        | FMR 12608       | <i>C. immitis</i> | Turkey         | N.I.                     | Human         |
| KF539886                        | SL-2 (clone)    | <i>C. immitis</i> | USA            | Monterey County Coast    | Sea Lion      |
| EF186790                        | CBS 113857      | <i>C. immitis</i> | USA            | Monterey County, CA      | Human         |
| KJ783446                        | 4359-08LN       | <i>C. immitis</i> | USA            | California               | Sea Otter     |
| KF539865                        | M2937           | <i>C. immitis</i> | USA            | Santa Barbara County, CA | Human         |
| KF539866                        | M2937 (clone)   | <i>C. immitis</i> | USA            | Santa Barbara County, CA | Human         |
| KF539883                        | Soil 3A (clone) | <i>C. immitis</i> | USA            | San Benedito County, CA  | Soil          |
| HQ219085                        | CDC_B727        | <i>C. immitis</i> | Argentina      | N.I.                     | Human         |
| KF539893                        | M4890 (clone)   | <i>C. immitis</i> | USA            | Santa Barbara County     | Human         |
| KF539872.1                      | K-727           | <i>C. immitis</i> | USA            | Kern County, CA          | Human         |
| KF539895                        | Venezuela       | <i>C. immitis</i> | Venezuela      | San Miguel, Lara state   | Human         |
| KF539898                        | Whiskey Hill    | <i>C. immitis</i> | USA            | Colusa County, CA        | Soil          |
| XR_001099875                    | RS              | <i>C. immitis</i> | USA            |                          | Human         |

|              |                      |                      |                   |                         |               |
|--------------|----------------------|----------------------|-------------------|-------------------------|---------------|
| KF539896     | Venezuela (clone)    | <i>C. immitis</i>    | Venezuela         | San Miguel, Lara state  | Human         |
| KF539874     | M3429                | <i>C. immitis</i>    | USA               | Santa Barbara County    | Human         |
| KF539862     |                      | 95 <i>C. immitis</i> | USA               | San Diego, CA           | Human         |
| AB232894     | IFM 50992            | <i>C. immitis</i>    | USA               | NI                      | Human         |
| KJ783445     | 4275-04SP            | <i>C. immitis</i>    | USA               | California              | Sea Otter     |
| AB232890     | IFM 45815            | <i>C. immitis</i>    | USA               | NI                      | Human         |
| KF539894     | Venezuela (clone)    | <i>C. immitis</i>    | Venezuela         | San Miguel, Lara state  | Human         |
| XR_001099879 | RS                   | <i>C. immitis</i>    | USA               |                         | Human         |
| EF186783     | CBS 166.51           | <i>C. immitis</i>    | USA               | NI                      | Human         |
| KF539861     |                      | 46 <i>C. immitis</i> | USA               | NI                      | Human         |
| EF186789     | CBS 113856           | <i>C. immitis</i>    | Mexico            | South Mexico, Michoacan | Human         |
| HQ219086     | RMSCC2395            | <i>C. immitis</i>    | USA               | California              | Human         |
| KF539862     | 95 (clone)           | <i>C. immitis</i>    | USA               | San Diego, CA           | Human         |
| EF186787     | CBS 113851           | <i>C. immitis</i>    | USA               | San Diego, CA           | Human         |
| KF539899     | Whiskey Hill (clone) | <i>C. immitis</i>    | USA               | Colusa County, CA       | Soil          |
| KF539875     | M3429                | <i>C. immitis</i>    | USA               | Santa Barbara County    | Human         |
| KF539897     | Whiskey Hill (clone) | <i>C. immitis</i>    | USA               | Colusa County, CA       | Soil          |
| HQ219090     | RMSCC2009            | <i>C. immitis</i>    | USA               | San Joaquin Valley, CA  | Human         |
| KF539876     | M3429                | <i>C. immitis</i>    | USA               | Santa Barbara County    | Human         |
| KR109218     | RKI05-0686           | <i>C. posadasii</i>  | Italy (Argentina) | N.I.                    | Human         |
| HQ219089     | RMSCC1036            | <i>C. posadasii</i>  | USA               | Tucson, AZ              | Human         |
| JX964799     | NCCPF 230018         | <i>C. posadasii</i>  | India             | N.I.                    | Human         |
| EF186786     | CBS 113846           | <i>C. posadasii</i>  | USA               | Tucson, AZ              | Human         |
| KF539879     | Silveira             | <i>C. posadasii</i>  | USA               | San Joaquin Valley, CA  | Human         |
| HQ219088     | RMSCC2343            | <i>C. posadasii</i>  | Mexico            | Nuevo Leon              | Human         |
| AB232889     | IFM 45813            | <i>C. posadasii</i>  | USA               | New York, NY            | Human         |
| AB232891     | IFM 45816            | <i>C. posadasii</i>  | USA               | N.I.                    | Human         |
|              |                      |                      |                   |                         | Rhesus Monkey |
| KC469983     | IDR1200041772        | <i>C. posadasii</i>  | USA               | New York, NY            | kidney cells  |
| AB232892     | IFM 45817            | <i>C. posadasii</i>  | USA               | N.I.                    | Human         |
| AB232885     | IFM 45809 (Silveira) | <i>C. posadasii</i>  | USA               | San Joaquin Valley, CA  | Human         |

|           |                    |                     |        |                           |               |
|-----------|--------------------|---------------------|--------|---------------------------|---------------|
| EF186785  | CBS 113843         | <i>C. posadasii</i> | USA    | San Antonio, TX           | Human         |
| AB232895  | IFM 50993          | <i>C. posadasii</i> | Japan  | Ishikawa, Kanazawa        | Human         |
| JX051631  | CEMM 05-4-10       | <i>C. posadasii</i> | Brazil | Santa Quitéria, Ceará     | Human         |
| AB232884  | IFM 4945           | <i>C. posadasii</i> | Japan  | Tokyo                     | Human         |
|           |                    |                     |        |                           | Rhesus Monkey |
| KC469982  | IDR1200041771      | <i>C. posadasii</i> | USA    | New York, NY              | kidney cells  |
| AB232901  | IFM 54196          | <i>C. posadasii</i> | Japan  | Chiba                     | Human         |
| EF186784  | CBS 196.34         | <i>C. posadasii</i> | N.I.   | N.I.                      | N.I.          |
| KM588216  | Silveira           | <i>C. posadasii</i> | USA    | San Joaquin Valley, CA    | Human         |
| KF373786  | S1203408.1         | <i>C. posadasii</i> | USA    | Somis, Ventura County, CA | Alpaca        |
| KF373787  | S1203408.2         | <i>C. posadasii</i> | USA    | Somis, Ventura County, CA | Alpaca        |
| HQ219087  | RMSCC2233          | <i>C. posadasii</i> | USA    | San Antonio, Texas        | Human         |
| AB232883  | IFM 4935           | <i>C. posadasii</i> | Japan  | Aichi, Nagoya             | Human         |
| U18360    | ATCC 28868         | <i>C. posadasii</i> | USA    | California                | Human         |
| NR_145259 | ATCC 28868 (clone) | <i>C. posadasii</i> | USA    | California                | Human         |
