# Supplementary material for: Detection of Coccidioides posadasii from xerophytic environments in Venezuela reveals risk of naturally acquired coccidioidomycosis infections
Source: PubMed Central journal article supplement (PMC5874253; doi:10.1038/s41426-018-0049-6), 2018-03-29
Supplement: 41426_2018_49_MOESM2_ESM.pdf [file 41426_2018_49_MOESM2_ESM.pdf]

**Table S2.** Plant species and vegetation type identified in the sampled areas in the Lara and Falcon states of Venezuela

| Sites – Vegetation type                                                                         | Plant species                                                                                                                                                                                                                                                                                                                                                                                      |
|-------------------------------------------------------------------------------------------------|----------------------------------------------------------------------------------------------------------------------------------------------------------------------------------------------------------------------------------------------------------------------------------------------------------------------------------------------------------------------------------------------------|
| 1 and 2 - <i>Urumaco/San José de Bruzual</i> - Shurbs tropophilous deciduous and semi-deciduous | <ul style="list-style-type: none"><li>· <i>Opuntia wentiana</i></li><li>· <i>O. caracasana</i></li><li>· <i>O. caribaea</i></li><li>· <i>Prosopis juliflora</i></li><li>· <i>Crysophyllum sp.</i></li><li>· <i>Cereus fricii</i></li><li>· <i>Acacia macracantha</i></li><li>· <i>Caesalpinia coriaria</i></li><li>· <i>Melocactus sp.</i></li><li>· <i>Tabebuia serratifolia</i></li></ul>        |
| 3, 4 and 5 - <i>Sucre (Pedregal)</i> - Tropophilous forest basimontane                          | <ul style="list-style-type: none"><li>· <i>Opuntia caribaea</i></li><li>· <i>O. wentiana</i></li><li>· <i>O. caracasana</i></li><li>· <i>Prosopis juliflora</i></li><li>· <i>Chrysophyllum sp.</i></li><li>· <i>Acacia macracantha</i></li><li>· <i>Acacia tortuosa</i></li><li>· <i>Bulnesia arborea</i></li><li>· <i>Coelogyne odoratissima</i></li><li>· <i>Tabebuia serratifolia</i></li></ul> |
| 6, 7 and 8 - <i>Democracia (Pecaya)</i> - Spiny xerophytic bushes                               | <ul style="list-style-type: none"><li>· <i>Opuntia caribaea</i></li><li>· <i>O. caracasana</i></li><li>· <i>Melocactus sp.</i></li><li>· <i>Cercidium praecox</i></li><li>· <i>Acacia tortuosa</i></li></ul>                                                                                                                                                                                       |

- *Bulnesia arborea*
- *Prosopis juliflora*
- *Cereus fricii*
- *Tabebuia serratifolia*

9, 10 and 11 - *Urdaneta (Siquisique)*

- *Opuntia caracasana*
- *O. wentiana*
- *O. caribaeae*,
- *Prosopis juliflora*
- *Cercidium praecox*
- *Rhodocactus guamacho*

12, 13 and 14 - *Torres (La Majada)*

- *Cactus caesius*
- *Opuntia caracasana*
- *Opuntia wentiana*
- *Prosopis juliflora*
- *Tabebuia sp.*
- *Alternanthera ficoidea.*

15 - *Torres (La Burra)*

- *Senna tora*
- *Caesalpinia coriaria*
- *Protium heptaphyllum*
- *Pseudopiptadenia pittieri*
- *Parinari pachyphylla*
- *Abutilon piramide*
- *Digitaria insularis*
